# Supplementary material
Source: PubMed Central journal article supplement (PMC5744201)
Supplement: JCM.01469-17_zjm001185756s1.pdf [file JCM.01469-17_zjm001185756s1.pdf]

**Supplementary Table 1.** Literature search on the use of smartphones for the diagnosis of parasites using all databases on ISI Web Knowledge.

The databases were searched for papers from 1900 to 2017 on 16/06/2017 at 10.54 AM (AEST).

| Search ID | Topic                                                                                                                                                                                                                                                                                                                     | Filter       | Papers found |
|-----------|---------------------------------------------------------------------------------------------------------------------------------------------------------------------------------------------------------------------------------------------------------------------------------------------------------------------------|--------------|--------------|
| 1.        | TOPIC: (mobile phon*) OR TOPIC: (cell* phon*) OR TOPIC: (smart phon*) OR TOPIC: (smartphon*) OR TOPIC: (digital phon*) OR TOPIC: (cellphon*) OR TOPIC: (mobile telephon*) OR TOPIC: (cell telephon*) OR TOPIC: (smart telephon*) OR TOPIC: (digital telephon*) OR TOPIC: (iphon*) OR TOPIC: (i-phon*) OR TOPIC: (Android) | Nil          | 66922        |
| 2.        | Search 1                                                                                                                                                                                                                                                                                                                  | Parasit*     | 229          |
| 3.        | Search 1                                                                                                                                                                                                                                                                                                                  | Helminth*    | 16           |
| 4.        | Search 1                                                                                                                                                                                                                                                                                                                  | Nematod*     | 16           |
| 5.        | Search 1                                                                                                                                                                                                                                                                                                                  | Trematode    | 0            |
| 6.        | Search 1                                                                                                                                                                                                                                                                                                                  | Cestod*      | 0            |
| 7.        | Search 1                                                                                                                                                                                                                                                                                                                  | Protoz*      | 9            |
| 8.        | Search 1                                                                                                                                                                                                                                                                                                                  | Mite*        | 9            |
| 9.        | Search 1                                                                                                                                                                                                                                                                                                                  | Fly          | 229          |
| 10.       | Search 1                                                                                                                                                                                                                                                                                                                  | Flies        | 229          |
| 11.       | Search 1                                                                                                                                                                                                                                                                                                                  | Tick*        | 142          |
| 12.       | Search 1                                                                                                                                                                                                                                                                                                                  | Bug*         | 96           |
| 13.       | Search 1                                                                                                                                                                                                                                                                                                                  | Flea*        | 3            |
| 14.       | Search 1                                                                                                                                                                                                                                                                                                                  | Ectoparasit* | 0            |
| 15.       | Search 1                                                                                                                                                                                                                                                                                                                  | Endoparasit* | 0            |
| 16.       | Search 1                                                                                                                                                                                                                                                                                                                  | Endoparasit* | 0            |
| 17.       | Search 1                                                                                                                                                                                                                                                                                                                  | Lice         | 1            |
| 18.       | Search 1                                                                                                                                                                                                                                                                                                                  | Louse        | 1            |
| 19.       | Search 1                                                                                                                                                                                                                                                                                                                  | Insect*      | 104          |
| 20.       | Search 1                                                                                                                                                                                                                                                                                                                  | Veterinar*   | 64           |
| 21.       | Search 1                                                                                                                                                                                                                                                                                                                  | Mosquito*    | 22           |
| 22.       | Search 1-21 combined                                                                                                                                                                                                                                                                                                      |              | 1327         |

|     |           |                                                                                                                                                                                                                                                                                                                                                                                                                                                                                                                                                                                                                                                                                                 |      |
|-----|-----------|-------------------------------------------------------------------------------------------------------------------------------------------------------------------------------------------------------------------------------------------------------------------------------------------------------------------------------------------------------------------------------------------------------------------------------------------------------------------------------------------------------------------------------------------------------------------------------------------------------------------------------------------------------------------------------------------------|------|
| 23. | Search 22 | BIOCHEMICAL RESEARCH METHODS OR RADIOLOGY NUCLEAR MEDICINE MEDICAL IMAGING OR BIOCHEMISTRY MOLECULAR BIOLOGY OR TOXICOLOGY OR IMMUNOLOGY OR PHARMACOLOGY PHARMACY OR OPERATIONS RESEARCH MANAGEMENT SCIENCE OR CELL BIOLOGY OR COMPUTER SCIENCE INTERDISCIPLINARY APPLICATIONS OR ZOOLOGY OR VETERINARY SCIENCES OR AGRICULTURE MULTIDISCIPLINARY OR MULTIDISCIPLINARY SCIENCES OR BIOLOGY OR MEDICINE RESEARCH EXPERIMENTAL OR HEALTH CARE SCIENCES SERVICES OR ENTOMOLOGY OR BIOPHYSICS OR CLINICAL NEUROLOGY OR PARASITOLOGY OR BIOTECHNOLOGY APPLIED MICROBIOLOGY OR MICROBIOLOGY OR HEMATOLOGY OR INFECTIOUS DISEASES OR HEALTH POLICY SERVICES OR NEUROSCIENCES OR DERMATOLOGY OR ALLERGY | 312  |
| 24. | Search 1  | Medica*                                                                                                                                                                                                                                                                                                                                                                                                                                                                                                                                                                                                                                                                                         | 3058 |
| 25. | Search 24 | Parasit*                                                                                                                                                                                                                                                                                                                                                                                                                                                                                                                                                                                                                                                                                        | 6    |
| 26. | Search 24 | Helminth*                                                                                                                                                                                                                                                                                                                                                                                                                                                                                                                                                                                                                                                                                       | 1    |
| 27. | Search 24 | Nematod*                                                                                                                                                                                                                                                                                                                                                                                                                                                                                                                                                                                                                                                                                        | 1    |
| 28. | Search 24 | Trematod*                                                                                                                                                                                                                                                                                                                                                                                                                                                                                                                                                                                                                                                                                       | 0    |
| 29. | Search 24 | Cestod*                                                                                                                                                                                                                                                                                                                                                                                                                                                                                                                                                                                                                                                                                         | 0    |
| 30. | Search 24 | Protoz*                                                                                                                                                                                                                                                                                                                                                                                                                                                                                                                                                                                                                                                                                         | 1    |
| 31. | Search 24 | Mite*                                                                                                                                                                                                                                                                                                                                                                                                                                                                                                                                                                                                                                                                                           | 0    |
| 32. | Search 24 | Fly                                                                                                                                                                                                                                                                                                                                                                                                                                                                                                                                                                                                                                                                                             | 11   |
| 33. | Search 24 | flies                                                                                                                                                                                                                                                                                                                                                                                                                                                                                                                                                                                                                                                                                           | 11   |
| 34. | Search 24 | Tick*                                                                                                                                                                                                                                                                                                                                                                                                                                                                                                                                                                                                                                                                                           | 2    |
| 35. | Search 24 | Bug*                                                                                                                                                                                                                                                                                                                                                                                                                                                                                                                                                                                                                                                                                            | 2    |
| 36. | Search 24 | Flea*                                                                                                                                                                                                                                                                                                                                                                                                                                                                                                                                                                                                                                                                                           | 0    |
| 37. | Search 24 | Ectoparasit*                                                                                                                                                                                                                                                                                                                                                                                                                                                                                                                                                                                                                                                                                    | 0    |
| 38. | Search 24 | Endoparasit*                                                                                                                                                                                                                                                                                                                                                                                                                                                                                                                                                                                                                                                                                    | 0    |
| 39. | Search 24 | Endoparasit*                                                                                                                                                                                                                                                                                                                                                                                                                                                                                                                                                                                                                                                                                    | 0    |
| 40. | Search 24 | Lice                                                                                                                                                                                                                                                                                                                                                                                                                                                                                                                                                                                                                                                                                            | 0    |
| 41. | Search 24 | Louse                                                                                                                                                                                                                                                                                                                                                                                                                                                                                                                                                                                                                                                                                           | 0    |
| 42. | Search 24 | Insect*                                                                                                                                                                                                                                                                                                                                                                                                                                                                                                                                                                                                                                                                                         | 1    |
| 43. | Search 24 | Mosquito*                                                                                                                                                                                                                                                                                                                                                                                                                                                                                                                                                                                                                                                                                       | 1    |
